# Supplementary material
Source: Elsevier journal article supplement (https://www.sciencedirect.com/science/article/pii/S0300289619303837)
Supplement: mmc2 [file S0300289619303837:mmc2.pdf]

**Table 4.** Clinical characteristics of the study group

|                                                         | Group 1 (n=31)           | Group 2<br>(n=31) | P     |
|---------------------------------------------------------|--------------------------|-------------------|-------|
|                                                         | Bi-nasal short<br>prongs | Nasal mask        |       |
| O <sub>2</sub> supplementation, days, median<br>(range) | 1 (3-6)                  | 1 (0.2-6)         | 0.740 |
| nCPAP duration, hours median (range)                    | 5 (2-27)                 | 5 (1-80)          | 0.146 |
| Any stage nasal trauma, n (%)                           | 4 (12.9)                 | 0 (0)             | 0.113 |
| Air leaks, n (%)                                        | 1 (3.2)                  | 1 (3.2)           | 1     |

nCPAP = nasal continuous positive airway pressure

O<sub>2</sub> = oxygen

1  
2  
3  
4  
5  
6  
7  
8  
9  
10  
11  
12  
13  
14  
15  
16  
17  
18  
19  
20  
21  
22  
23  
24  
25  
26  
27  
28  
29  
30  
31  
32  
33  
34  
35  
36  
37  
38  
39  
40  
41  
42  
43  
44  
45  
46  
47  
48  
49  
50  
51  
52  
53  
54  
55  
56  
57  
58  
59  
60  
61  
62  
63  
64  
65
